# Supplementary material for: Cognitive neural responses in the semantic comprehension of sound symbolic words and pseudowords
Source: PubMed Central journal article supplement (PMC10603230; doi:10.3389/fnhum.2023.1208572), 2023-10-11
Supplement: Data_Sheet_1.pdf [file Data_Sheet_1.pdf]

## Supplementary Material

# Cognitive Neural Responses in the Semantic Comprehension of Sound Symbolic Words and Pseudowords

Kaori Sasaki\*, Seiichi Kadowaki, Junya Iwasaki, Marta Pijanowska, Hidehiko Okamoto

\* Correspondence: Kaori Sasaki: [kaori.s@iuhw.ac.jp](mailto:kaori.s@iuhw.ac.jp)

### 1 Supplementary Data

| Sound Symbolic words |            | sound symbolic pseudowords |              |
|----------------------|------------|----------------------------|--------------|
| match                | mismatch   | match                      | mismatch     |
| zuruzuru             | punipuni   | zusuzusu                   | pubipubi     |
| gayagaya             | jorijori   | gawagawa                   | jojijoji     |
| mishimishi           | jitojito   | mikimiki                   | jinojino     |
| bukubuku             | zukizuki   | bufubufu                   | zuchizuchi   |
| giigii               | nukunuku   | gikigiki                   | nufunufu     |
| katakata             | chikuchiku | kadakada                   | chipuchipu   |
| gutsugutsu           | zarazara   | gufugufu                   | zasazasa     |
| korokoro             | nebaneba   | konokono                   | nepanepa     |
| bachabacha           | mokomoko   | bazabaza                   | mohomoho     |
| garagara             | pokapoka   | ganagana                   | pohapoha     |
| dosadosa             | muzumuzu   | dozadoza                   | mugumugu     |
| chokichoki           | sarasara   | chochichochi               | sanasana     |
| patapata             | nechanecha | pahapaha                   | nenyanenya   |
| jarajara             | nyurunyuru | jadajada                   | nyununyunu   |
| gachagacha           | jinjin     | gakyagakya                 | jishijishi   |
| jabujabu             | funyafunya | jafujafu                   | furyafurya   |
| chorochoro           | fuwafuwa   | chopochopo                 | fuhafuha     |
| poripori             | igaiga     | pogipogi                   | idaida       |
| gunyagunya           | zokuzoku   | guryagurya                 | zozuzozu     |
| kasakasa             | jimejime   | kazakaza                   | jinejine     |
| chikuchiku           | katakata   | chipuchipu                 | kadakada     |
| jorijori             | gayagaya   | jojijoji                   | gawagawa     |
| mokomoko             | bachabacha | mohomoho                   | bazabaza     |
| sarasara             | chokichoki | sanasana                   | chochichochi |
| punipuni             | zuruzuru   | pubipubi                   | zusuzusu     |
| jinjin               | gachagacha | jishijishi                 | gakyagakya   |
| zokuzoku             | gunyagunya | zozuzozu                   | guryagurya   |

## Supplementary Material

zukizuki  
pokapoka  
nebaneba  
igaiga  
jitojito  
nukunuku  
jimejime  
fuwafuwa  
funyafunya  
nechanecha  
muzumuzu  
nyurunyuru  
zarazara

bukubuku  
garagara  
korokoro  
poripori  
mishimishi  
giigii  
kasakasa  
chorochoro  
jabujabu  
patapata  
dosadosa  
jarajara  
gutsugutsu

zuchizuchi  
pohapoha  
nepanepa  
idaida  
jinojino  
nufunufu  
jinejine  
fuhafuha  
furyafurya  
nenyanenya  
mugumugu  
nyununyunu  
zasazasa

bufubufu  
ganagana  
konokono  
pogipogi  
mikimiki  
gikigiki  
kazakaza  
chopochopo  
jafujafu  
pahapaha  
dozadoza  
jadajada  
gufugufu
