# Supplementary material for: Cognitive neural responses in the semantic comprehension of sound symbolic words and pseudowords
Source: PubMed Central journal article supplement (PMC10603230; doi:10.3389/fnhum.2023.1208572), 2023-10-11
Supplement: Data_Sheet_2.pdf [file Data_Sheet_2.pdf]

| word vs. pseudoword | Sound symbolic pseudoword |          | Sound symbolic word |          |
|---------------------|---------------------------|----------|---------------------|----------|
|                     | match                     | mismatch | match               | mismatch |
| N-1                 | -2.2912                   | -2.1334  | 1.8912              | -2.7651  |
| N-2                 | 3.6116                    | -1.4248  | 7.0915              | 5.5737   |
| N-3                 | -4.0308                   | -4.4723  | -2.2739             | -4.0896  |
| N-4                 | 0.3415                    | 0.4369   | -1.6858             | -1.2876  |
| N-5                 | 3.3684                    | -0.8505  | 8.3979              | 1.1739   |
| N-6                 | 3.5036                    | 0.2068   | 4.0557              | -0.5091  |
| N-7                 | 1.5411                    | -3.7881  | 0.3446              | -2.7893  |
| N-8                 | -2.5972                   | -3.5315  | -2.6975             | -1.7308  |
| N-9                 | 0.8139                    | 1.2944   | 2.8228              | 0.4573   |
| N-10                | 1.168                     | 0.323    | 1.0526              | 1.7257   |
| N-11                | 2.7516                    | 3.6168   | 2.218               | 3.5408   |
| N-12                | -9.0675                   | -9.6775  | -4.6887             | -7.7021  |
| N-13                | -6.0561                   | -12.2925 | -2.1554             | -7.5277  |
| N-14                | -4.8261                   | -2.8396  | 1.0517              | -0.4541  |
| N-15                | -13.4096                  | -14.5823 | -14.1891            | -13.7815 |
| N-16                | -1.9714                   | -4.667   | -0.764              | 0.1178   |
| N-17                | -7.0184                   | -5.8735  | -4.2278             | -4.5689  |
