# Supplementary material for: Cognitive neural responses in the semantic comprehension of sound symbolic words and pseudowords
Source: PubMed Central journal article supplement (PMC10603230; doi:10.3389/fnhum.2023.1208572), 2023-10-11
Supplement: Data_Sheet_3.pdf [file Data_Sheet_3.pdf]

| word vs. pseudoword | Sound symbolic pseudoword |          | Sound symbolic word |          |
|---------------------|---------------------------|----------|---------------------|----------|
| match vs. mismatch  | match                     | mismatch | match               | mismatch |
| N-1                 | 366                       | 379      | 351                 | 353      |
| N-2                 | 386                       | 396      | 391                 | 403      |
| N-3                 | 382                       | 382      | 390                 | 381      |
| N-4                 | 359                       | 360      | 375                 | 389      |
| N-5                 | 395                       | 403      | 397                 | 414      |
| N-6                 | 372                       | 407      | 363                 | 401      |
| N-7                 | 383                       | 397      | 363                 | 408      |
| N-8                 | 382                       | 368      | 374                 | 392      |
| N-9                 | 436                       | 451      | 379                 | 362      |
| N-10                | 403                       | 397      | 393                 | 391      |
| N-11                | 341                       | 327      | 348                 | 382      |
| N-12                | 355                       | 409      | 400                 | 405      |
| N-13                | 374                       | 378      | 384                 | 401      |
| N-14                | 416                       | 420      | 366                 | 399      |
| N-15                | 348                       | 368      | 368                 | 395      |
| N-16                | 351                       | 385      | 359                 | 369      |
| N-17                | 367                       | 376      | 366                 | 374      |
