# Supplementary material for: Cognitive neural responses in the semantic comprehension of sound symbolic words and pseudowords
Source: PubMed Central journal article supplement (PMC10603230; doi:10.3389/fnhum.2023.1208572), 2023-10-11
Supplement: Data_Sheet_4.pdf [file Data_Sheet_4.pdf]

| word vs. pseudoword | Sound symbolic pseudoword |          | Sound symbolic word |          |
|---------------------|---------------------------|----------|---------------------|----------|
|                     | match                     | mismatch | match               | mismatch |
| N-1                 | -1.861                    | -2.849   | 2.653               | -1.933   |
| N-2                 | 2.355                     | -1.070   | 7.517               | 6.467    |
| N-3                 | 2.311                     | 1.577    | 5.443               | 0.929    |
| N-4                 | -0.246                    | -0.480   | -0.065              | -0.480   |
| N-5                 | 4.853                     | 0.939    | 7.939               | 3.046    |
| N-6                 | 1.719                     | 0.202    | 3.550               | 0.187    |
| N-7                 | 3.149                     | -2.345   | 1.334               | -0.671   |
| N-8                 | 0.973                     | -4.183   | 2.938               | -1.000   |
| N-9                 | 0.336                     | 1.301    | 2.684               | -3.173   |
| N-10                | 1.278                     | 1.200    | 3.304               | 2.669    |
| N-11                | 3.733                     | 6.068    | 5.444               | 4.976    |
| N-12                | -8.052                    | -9.465   | -0.347              | -4.485   |
| N-13                | -2.936                    | -9.434   | -0.251              | -2.221   |
| N-14                | -3.053                    | -1.380   | 2.483               | 0.129    |
| N-15                | -10.826                   | -12.127  | -10.121             | -12.605  |
| N-16                | -1.341                    | -7.466   | -0.994              | -0.590   |
| N-17                | -0.709                    | -1.119   | 1.557               | -1.519   |
